# Supplementary material for: Downregulation of Mitochondrial TSPO Inhibits Mitophagy and Reduces Enucleation During Human Terminal Erythropoiesis
Source: PubMed Central journal article supplement (PMC7730461; doi:10.3390/ijms21239066), 2020-11-28
Supplement: ijms-21-09066-s001.pdf [file ijms-21-09066-s001.pdf]

# Downregulation of Mitochondrial TSPO Inhibits Mitophagy and Reduces Enucleation During Human Terminal Erythropoiesis

Martina Moras <sup>1,2,3</sup>, Claude Hattab <sup>1,2,3</sup>, Pedro Gonzalez-Menendez <sup>3,4</sup>, Suella Martino <sup>1,2,3</sup>, Jerome Larghero <sup>5</sup>, Caroline Le Van Kim <sup>1,2,3</sup>, Sandrina Kinet <sup>3,4</sup>, Naomi Taylor <sup>3,4,6</sup>, Sophie D. Lefevre <sup>1,2,3,†</sup> and Mariano A. Ostuni <sup>1,2,3,\*,†</sup>

<sup>1</sup> Université de Paris, UMR\_S1134, BIGR, Inserm, F-75015 Paris, France; martina.moras@inserm.fr (M.M.); chattab@ints.fr (C.H.); suella.martino@inserm.fr (S.M.); caroline.le-van-kim@inserm.fr (C.L.V.K.); sophie.lefevre@inserm.fr (S.D.L.)

<sup>2</sup> Institut National de Transfusion Sanguine, F-75015 Paris, France

<sup>3</sup> Laboratoire d'Excellence GR-Ex, F-75015 Paris, France; pedro.gonzalez-menendez@igmm.cnrs.fr (P.G.-M.); sandrina.kinet@igmm.cnrs.fr (S.K.); naomi.taylor@igmm.cnrs.fr (N.T.)

<sup>4</sup> Institut de Génétique Moléculaire de Montpellier, University of Montpellier, CNRS, F-34293 Montpellier, France

<sup>5</sup> Unité de Thérapie cellulaire, AP-HP, Hôpital Saint-Louis, F-75010 Paris, France; jerome.larghero@aphp.fr

<sup>6</sup> Pediatric Oncology Branch, Center for Cancer Research (CCR), National Cancer Institute (NCI), National Institutes of Health (NIH), Bethesda, MD 20892, USA

\* Correspondence: mariano.ostuni@inserm.fr; Tel.: +33-1-4449-3135

† These authors have equally contributed to this work.

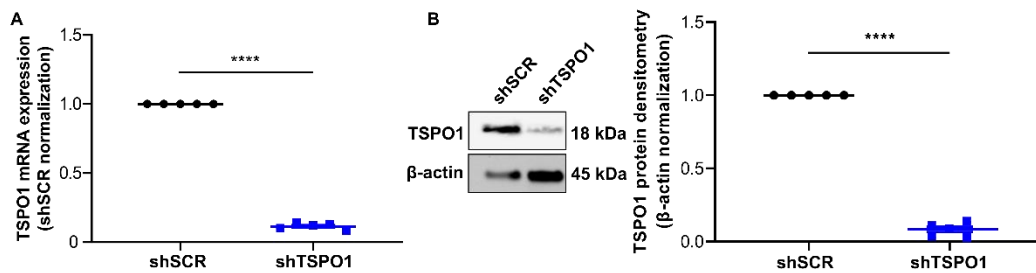

**Figure S1.** TSPO1 knockdown in erythroid cells at day 10 of ex vivo differentiation. (A) RT-qPCR (n=5) and (B) Western Blot-based quantification (n=5) of TSPO1 levels at day 10 of differentiation to validate the downregulation caused by the shRNA. Levels in shSCR-transduced cells were arbitrarily set at "1". \*\*\*\*p<0.0001.
